# Supplementary figures and images for: Long noncoding RNAs in C. elegans
Source: HighWire-hosted journal article supplement (doi:10.1101/gr.140475.112), 2012-06-15

Figure S5.

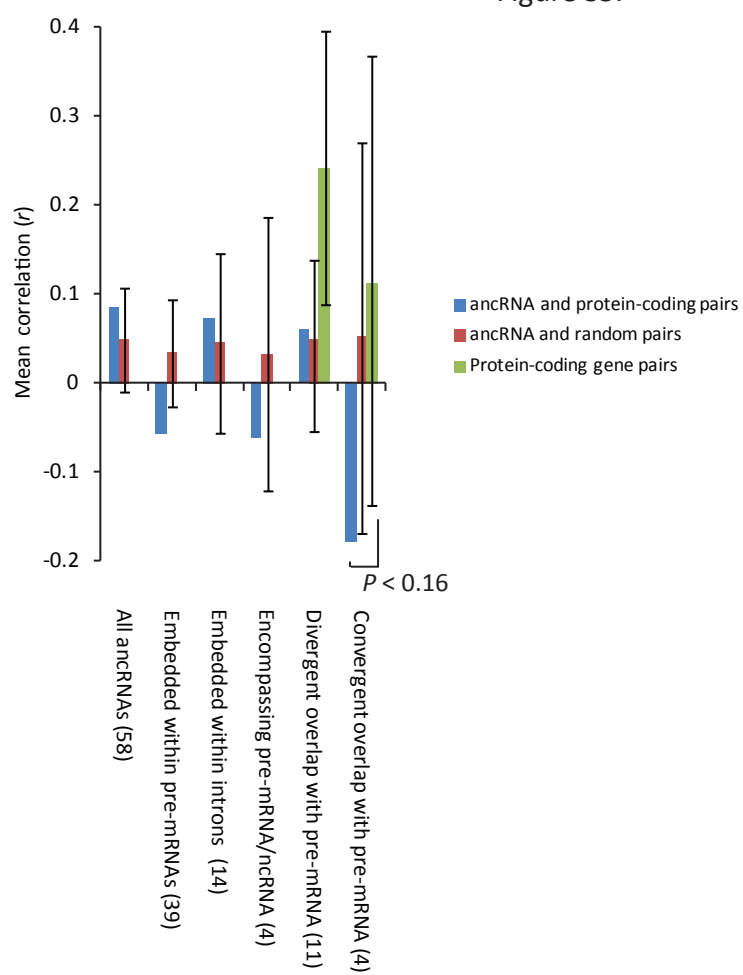

Supplement: Figure_S5.pdf [file Figure_S5.pdf]
